# Supplementary material
Source: PubMed Central journal article supplement (PMC7263289)
Supplement: ry192173suppa1.pdf [file ry192173suppa1.pdf]

## **Appendix E1**

### **Supplemental Materials and Methods**

#### **Neural Network Training Data**

From 400 short-axis examinations, we used 37,700 1.5T images + 32,380 3.0T images for training, 10,720 1.5T images + 32,380 3.0T images for validation, and 5,167 1.5T images + 4,740 3.0T images for testing. All reported statistical analyses are based on performance on the test set.

#### **Recovery of Fourier Data from DICOM Files**

To recover measured k-space data from source Digital Imaging and Communications in Medicine (DICOM) files, we first queried the Acquisition Matrix (0018,1310) field to determine the extent of Fourier zero-padding used by the manufacturer. We effectively reversed this zero-padding by transforming the DICOM pixel data to k-space and removing interpolated data beyond the acquisition matrix geometry.

#### **Fourier Downsampling of Multiframe Data**

To generate synthetic multiframe training data, we performed the same downsampling strategy at the time frame of interest and adjacent flanking time frames. The three downsampled frames were stacked as a single volume to provide an input for the multiframe variants of the neural networks.

#### **Hybrid Loss Function**

We used the Tensorflow implementation of multiscale structural similarity index (MS-SSIM) and its default settings for filter size = 11, filter sigma = 1.5,  $k_1 = 0.01$ , and  $k_2 = 0.03$ . Due to relatively small  $128 \times 128$  matrix size for training data, we only used the first four default MS-SSIM power factors and renormalized them resulting in the weights [0.0517,0.3295,0.3462,0.2726]. For multiframe experiments, we added the 3D L1-loss to the mean of the MS-SSIM losses calculated for each of the three adjacent timeframes.

#### **Other Training Parameters**

We used the hyperbolic tangent as the final activation function for all cognitive neural networks (CNNs). Additionally, we used the Adam optimizer with a learning rate of  $1e-4$ . We performed training with early-stopping for a maximum of 25 epochs. We trained a unique set of UNets and SRNets for multiple degrees of upsampling, from  $2\times$  to  $64\times$ .

#### **Super-Resolution of Low-Resolution Images**

To predict a high-resolution image from low-resolution inputs, we z-padded outer k-space of the low-resolution acquisitions, transformed them to the image domain, retained the central  $128 \times 128$ , and scaled pixel values to [0,1] prior to CNN inference.

## Super-Resolution of Full-Resolution Images

To further super-resolve full-resolution acquisitions, we divided each full-resolution image into tiles, transformed the tiles into k-space, z-padded them to  $128 \times 128$ , converted them to image space, and scaled pixel values to  $[0,1]$  prior to CNN inference. We then concatenated the super-resolved tiles to form a higher resolution image.

As an example, to super-resolve a  $128 \times 128$  image by a factor of 4 ( $2\times$  along the row direction and  $2\times$  along the column direction), we first subdivide the source image into 4  $64 \times 64$  tiles. We then transform each tile to k-space and z-pad them to  $128 \times 128$ . We then convert each tile back to image space, scale the pixel values to  $[0,1]$ , and use k-UNet to super-resolve each tile. Following super-resolution, we have 4  $128 \times 128$  tiles which, in this case, correspond to the four quadrants of our input image. We then concatenate the tiles relative to their original position in the source image to generate a final  $256 \times 256$  super-resolved image.
